# Supplementary material
Source: PubMed Central journal article supplement (PMC5784205)
Supplement: rspb20172599supp1.pdf [file rspb20172599supp1.pdf]

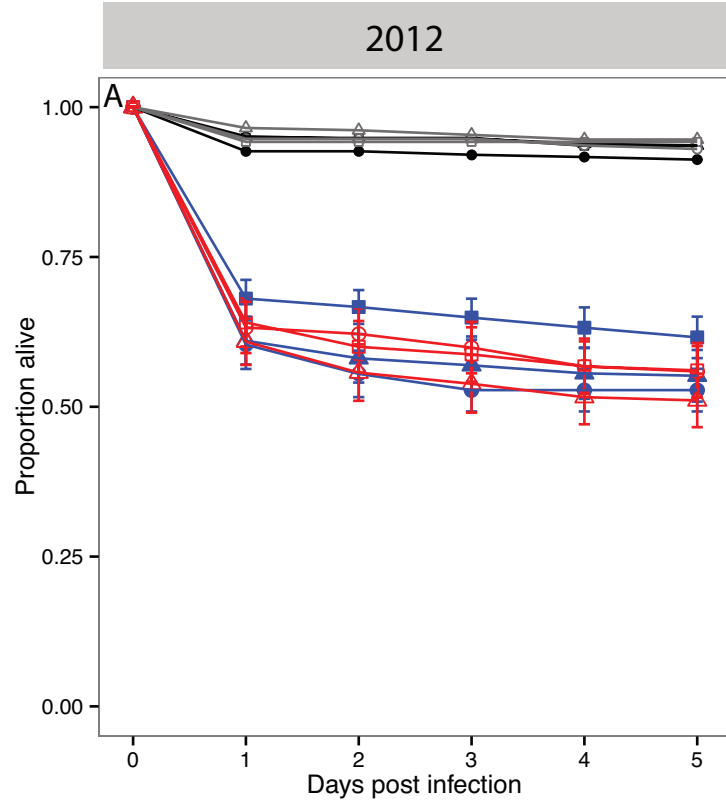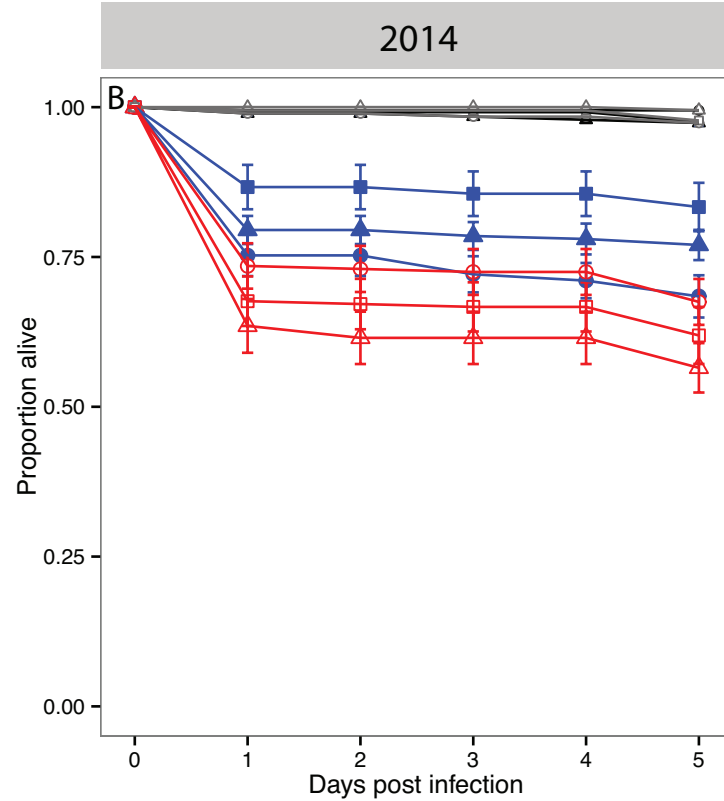

*Enterococcus faecalis*

**Population**

- MA
- △ PA
- VA

**Collection Time**

- Spring (infected)
- Spring (control)
- Fall (infected)
- Fall (control)

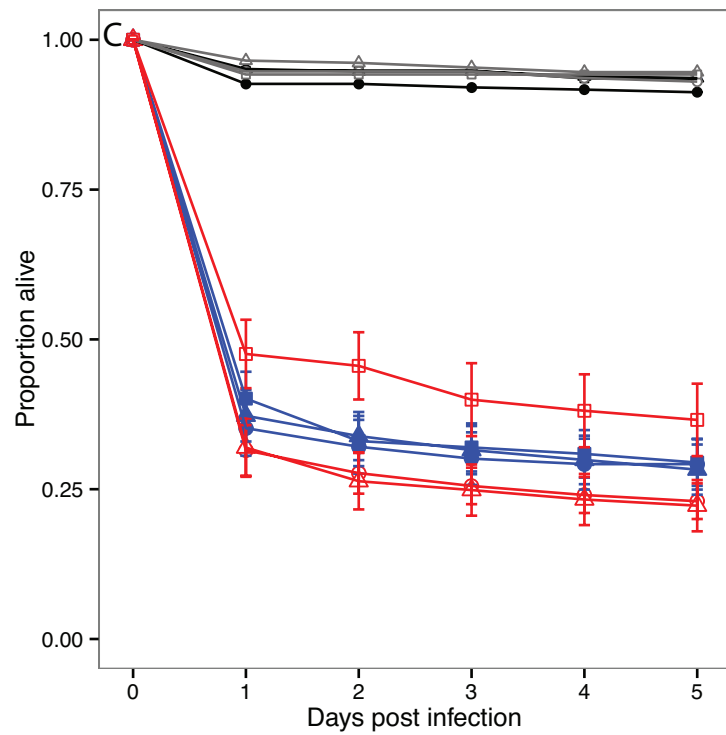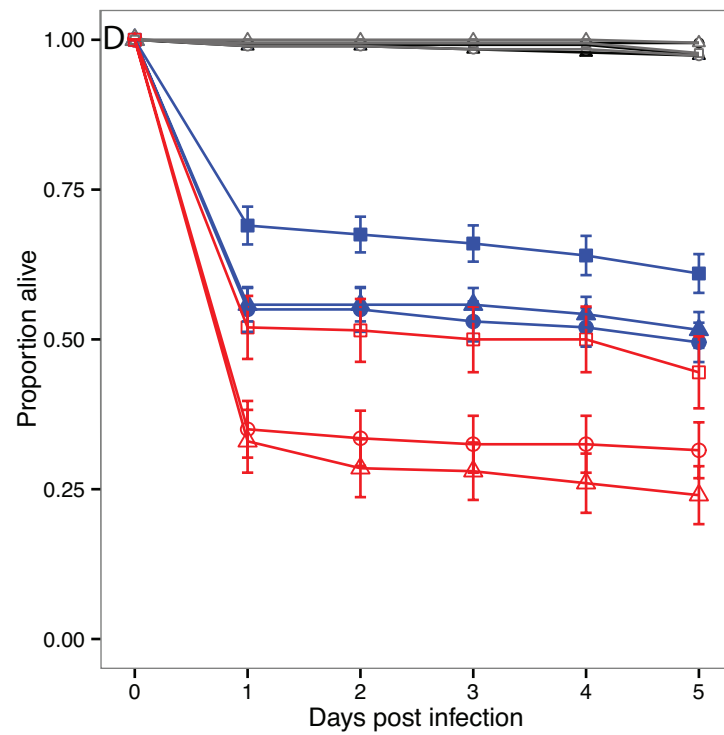

*Providencia rettgeri*
