# Supplementary material
Source: PubMed Central journal article supplement (PMC5784205)
Supplement: rspb20172599supp2.pdf [file rspb20172599supp2.pdf]

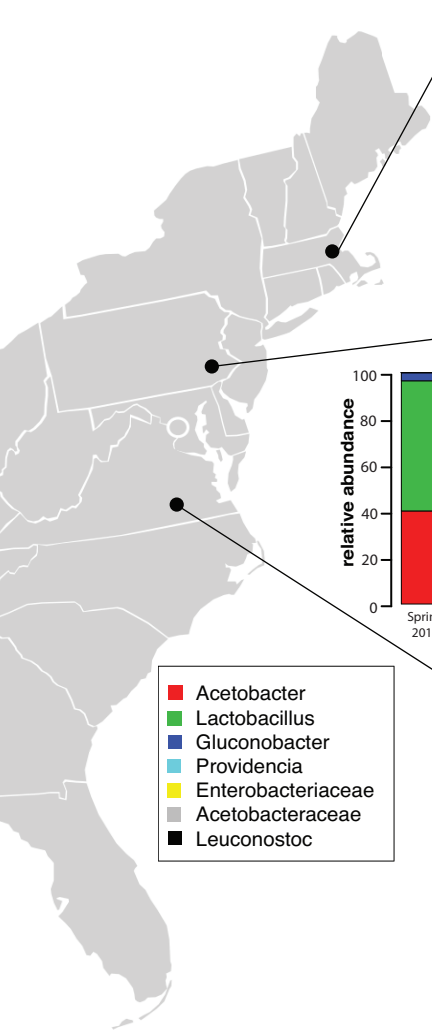

### Massachusetts

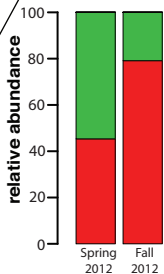

### Pennsylvania

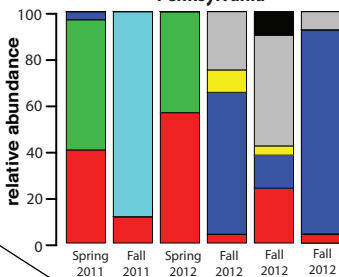

### Virginia

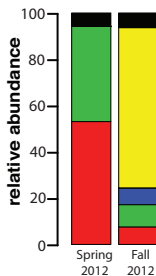

- Acetobacter
- Lactobacillus
- Gluconobacter
- Providencia
- Enterobacteriaceae
- Acetobacteraceae
- Leuconostoc
